# Supplementary material
Source: publisher site journal article supplement (https://www.dovepress.com/article/266750)

**Supplementary Table S1: Patient Baseline Characteristics: STAS (-) versus STAS (+) Before and After Propensity Score Matching**

|  | **Before matching** | | | |  | **After matching** | | | |
| --- | --- | --- | --- | --- | --- | --- | --- | --- | --- |
| **Variables** | **STAS (-)**  **(n=1674)** | **STAS (+)**  **(n=174)** | ***P* value** | **SMD** |  | **STAS (-)**  **(n=170)** | **STAS (+)**  **(n=170)** | ***P* value** | **SMD** |
| Age (y)a | 57.3 ± 10.1 | 58.9 ± 10.3 | 0.039b | .163 |  | 58.9 ± 9.0 | 58.8 ± 10.1 | 0.932b | -.009 |
| Sexa  Female  Male | 1114 (67.6)  533 (32.4) | 100 (42.5)  74 (57.5) | 0.006 | .205 |  | 92 (54.1)  78 (45.9) | 100 (58.8)  70 (41.2) | 0.444 | .095 |
| Smoking status a  Never smoked  Former or current smoker | 1308 (79.4)  339 (20.6) | 118 (67.8)  56 (32.2) | <0.001 | .248 |  | 116 (68.2)  54 (31.8) | 118 (69.4)  52 (30.6) | 0.907 | -.025 |
| Pulmonary function a  FVC/predicted (%)  FEV1/predicted (%) | 86.0 ± 15.6  85.9 ± 16.6 | 82.8 ± 16.3  82.3 ± 17.2 | 0.009 b  0.006 b | -.199  -.211 |  | 82.1 ± 17.8  81.7 ± 18.6 | 83.4 ± 15.9  82.9 ± 16.8 | 0.482 b  0.535 b | .079  .070 |
| Family history of lung cancer  Yes  No | 150 (9.1)  1497 (90.9) | 10 (5.7)  164 (94.3) | 0.159 | NA |  | 14 (8.2)  156 (91.8) | 10 (5.9)  160 (94.1) | 0.526 | NA |
| Comorbiditiesd  Lung cancer history  Other malignancies  Hypertension  Diabetes mellitus  Cardiac disease | 49 (3.0)  94 (5.7)  292 (17.7)  108 (6.6)  40 (2.4) | 4 (2.3)  5 (2.9)  43 (24.7)  14 (8.0)  8 (4.6) | 0.147 | NA |  | 7 (4.1)  9 (5.3)  27 (15.9)  15 (8.8)  5 (2.9) | 3 (1.8)  5 (2.9)  40 (23.5)  13 (7.6)  5 (2.9) | 0.256 | NA |
| CEA a  Abnormal e  Normal  N/A | 178 (10.8)  1333 (80.9)  136 (8.3) | 53 (30.5)  111 (63.8)  10 (5.7) | <0.001 | .426 |  | 47 (27.6)  118 (69.4)  5 (2.9) | 49 (28.8)  111 (65.3)  10 (5.9) | 0.382 | .025 |
| Tumor size (cm) a | 1.4 (0.2-10.5) | 2.2 (0.6-6.5) | <0.001c | .662 |  | 2.1 (0.5-8.5) | 2.2 (0.6-6.5) | 0.406c | .016 |

a Variables used as covariates for propensity score matching; b comparison between variables was performed using the independent t-test; c comparison between variables was performed using the Mann-Whitney U test; d one patient may experience one or more comorbidities; e a value of 5.0 ng/ml or higher indicates an abnormal CEA level.

Abbreviations: STAS, spread through air spaces; STAS (+), positive for STAS, STAS (–), negative for STAS; SMD, standardized mean difference; FVC, forced vital capacity; FEV1, forced expiratory volume in one second; CEA, carcinoembryonic antigen; N/A, non-applicable.

**Supplementary Table S2. Published Studies Reported Factors that Correlated with STAS in Lung Adenocarcinoma**

| Authors | No. patients | AJCC Stage | Recurrence | STAS (+)  % | Correlated factors | | | |
| --- | --- | --- | --- | --- | --- | --- | --- | --- |
| **Clinical** | **Pathological** | **Genetical** | **Prognostic** |
| Onozato et al.  2013 | 261 | I-II |  | 22.2 | Smoking | Solid or micropapillary pattern, higher nuclear grade | KRAS mutation, EGFR wild-type | Poor DFS |
| Kadota et al. 2015 | 411 | I  (size ≤2cm) | Higher risk of distant/  locoregional recurrence; | 37.7 | NS | Lymphovascular invasion, micropapillary and solid patterns  absence of lepidic pattern | NR | Poor OS |
| Warth et al. 2015 | 569 | I-IV |  | 51.6 | Male | High TNM stage,  micropapillary pattern,  absence of lepidic pattern | BRAF Mutation, EGFR wild-type, | Poor DFS Poor OS |
| Shiono et al.  2016 | 318 | I |  | 14.8 | Smoking, male, CEA,  solid nodules on CTa | High TNM stage, lymphovascular invasion, pleural invasion | EGFR wild-type | Poor DFS Poor OS |
| Morimoto et al. 2016 | 444 | I-IV |  | 7.0 | NS | lymphovascular invasion, | NR | Poor OS |
| Dai et al.  2017 | 544 | I |  | 30.3 | Male | Micropapillary and solid patterns,  absence of lepidic pattern | NR | Poor DFS Poor OS |
| Uruga et al. 2017 | 208 | I  (size ≤2cm) |  | 47.6 | NS | lymphovascular invasion,  Tumor size, pleural invasion, solid pattern | NR | Poor DFS Poor OS |
| Toyokawa et al.  2018 | 276 | I |  | 55.4 | SUV on PET-CT  CTR on CT | Tumor size, pleural invasion | NS | Poor DFS Poor OS |
| Hu et al.  2018 | 500 | I-III |  | 26.8 | NS | High TNM stage, moderate/poor differentiation, lymphovascular invasion | NS | NR |
| Toyokawa et al.  2018 | 327 | I |  | 58.4 | CTR, notch on CTb | High TNM stage, tumor size | NS | Poor DFS Poor OS |
| Lee et al.  2018 | 316 | I-III |  | 50.6 | NS | Micropapillary and cribriform pattern,  lymphovascular invasion  absence of lepidic pattern | EGFR wild-type | Poor DFS |
| Kim et al.  2018 | 276 | I-III |  | 33.3 | Solid component on CT | High TNM stage, lymphatic invasion, | ALK rearrangement,  EGFR wild-type | Poor DFS |

**Abbreviations**: AJCC, American Joint Committee on Cancer; STAS, spread through air spaces; OS, overall survival; DFS, disease-free survival; NS, statistically not significant; NR, not reported; CEA, carcinoembryonic antigen; CT, computed tomography; SUV, standardized uptake value; PET, positron emission tomography; CTR, consolidation-to-tumor ratio.

a solid nodule was defined as those that completely obscured the lung parenchyma on CT images; b notch was defined as a portion of the surface of a lesion showing a shallow, wavy configuration, with the exception of the regions abutting the pleura.

**Supplementary Table S2 References**

1. Onozato ML, Kovach AE, Yeap BY, et al. Tumor islands in resected early-stage lung adenocarcinomas are associated with unique clinicopathologic and molecular characteristics and worse prognosis. *Am J Surg Pathol* 2013; 37: 287-294.
2. Kadota K, Nitadori JI, Sima CS, et al. Tumor spread through air spaces is an important pattern of invasion and impacts the frequency and location of recurrences after limited resection for small stage I lung adenocarcinomas. *J Thorac Oncol* 2015; 10: 806-814.
3. Warth A, Muley T, Kossakowski CA, et al. Prognostic impact of intra-alveolar tumor spread in pulmonary adenocarcinoma. *Am J Surg Pathol* 2015; 39: 793-801.
4. Shiono S, Yanagawa N. Spread through air spaces is a predictive factor of recurrence and a prognostic factor in stage I lung adenocarcinoma. *Interact Cardiovasc Thorac Surg* 2016; 23: 567-72.
5. Morimoto J, Nakajima T, Suzuki H, et al. Impact of free tumor clusters on prognosis after resection of pulmonary adenocarcinoma. *Thorac Cardiovasc Surg* 2016; 152: 64-72.
6. Dai C, Xie H, Su H, et al. Tumor spread through air spaces affects the recurrence and overall survival in patients with lung adenocarcinoma >2 to 3 cm. *J Thorac Oncol* 2017; 12: 1052-1060.
7. Uruga H, Fujii T, Fujimori S, et al., Semiquantitative assessment of tumor spread through air spaces (STAS) in early-stage lung adenocarcinomas. *J Thorac Oncol* 2017; 12: 1046-1051.
8. Toyokawa G, Yamada Y, Tagawa T, et al. Significance of spread through air spaces in resected pathological stage I lung adenocarcinoma. *Ann Thorac Surg* 2018; 105: 1655-1663.
9. Hu SY, Hsieh MS, Hsu HH, et al. Correlation of tumor spread through air spaces and clinicopathological characteristics in surgically resected lung adenocarcinomas. *Lung Cancer* 2018; 126: 189-193.
10. Toyokawa G, Yamada Y, Tagawa T, et al. Computed tomography features of resected lung adenocarcinomas with spread through air spaces. *J Thorac Cardiovasc Surg* 2018; 156: 1670-1676.
11. Lee JS, Kim EK, Kim M, et al. Genetic and clinicopathologic characteristics of lung adenocarcinoma with tumor spread through air spaces. Lung Cancer 2018; 123: 121-126.
12. Kim SK, Kim TJ, Chung MJ, et al. Lung adenocarcinoma: CT features associated with spread through air spaces. *Radiology* 2018; 289: 831-840.

**Supplementary Figure S1.** Flowchart for patient inclusion and exclusion.

ADC, adenocarcinoma; STAS, spread through air spaces.


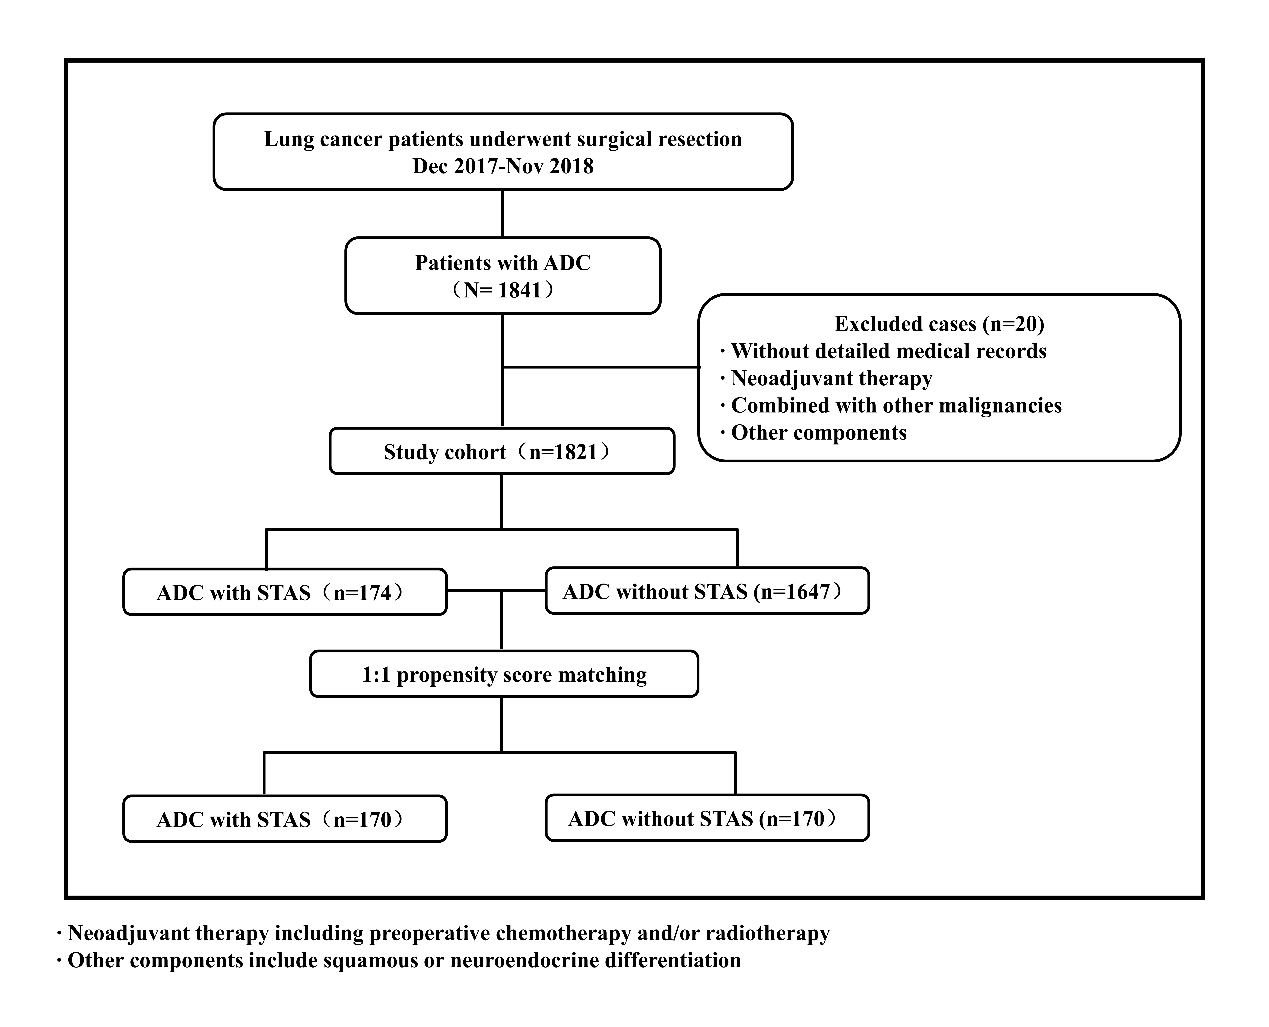


**Supplementary Figure S2.** Balance analysis of the propensity score analysis. A, Distribution of propensity scores in both groups before and after matching; B, distribution of standardized differences in the matched variables before and after matching; C, after matching, the two groups achieved minimal standardized differences in the matched variables.


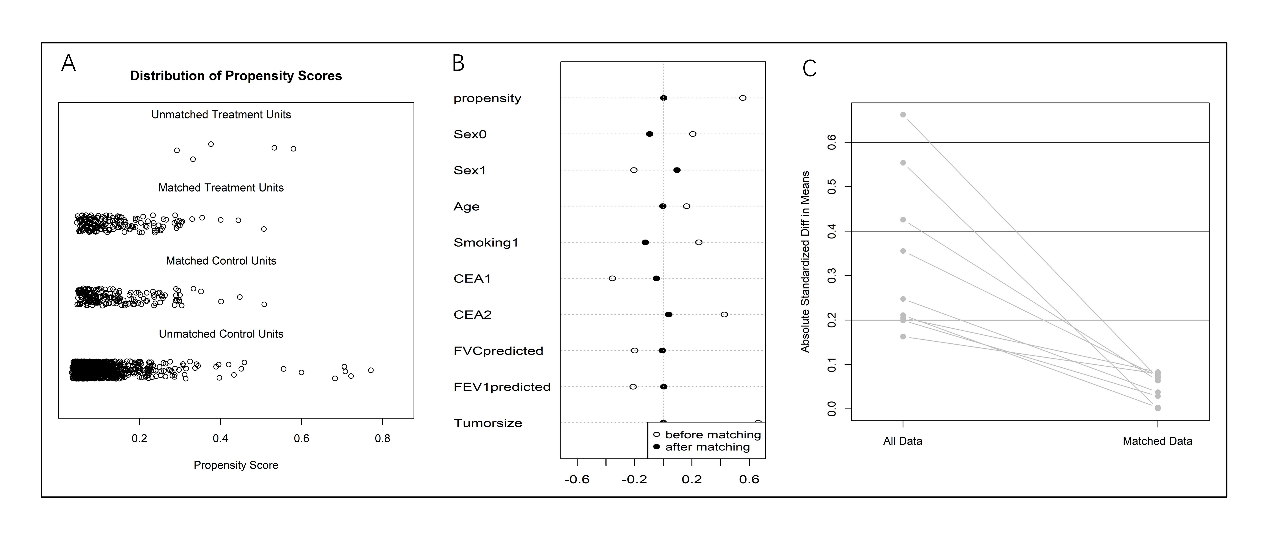

Supplement: Supplementary file 1 [file get_supplementary_file.php]
